1 **Single-vessel cerebral blood flow fMRI to map blood velocity by phase-contrast**  
2 **imaging**

3

4 Xuming Chen<sup>1,2</sup>, Yuanyuan Jiang<sup>3</sup>, Sangcheon Choi<sup>1,4</sup>, Rolf Pohmann<sup>1</sup>,  
5 Klaus Scheffler<sup>1,5</sup>, David Kleinfeld<sup>6,7</sup> and Xin Yu<sup>1,3,8,\*</sup>

6 <sup>1</sup>High-Field Magnetic Resonance, Max Planck Institute for Biological Cybernetics, 72076  
7 Tübingen, Germany.

8 <sup>2</sup>Department of Neurology, Wuhan University, Renmin Hospital, Wuhan 430060, China.

9 <sup>3</sup>Athinoula A. Martinos Center for Biomedical Imaging, Massachusetts General Hospital and  
10 Harvard Medical School, Charlestown 02129 MA, USA.

11 <sup>4</sup>Graduate Training Centre of Neuroscience, International Max Planck Research School,  
12 University of Tübingen, 72074 Tübingen, Germany.

13 <sup>5</sup>Department for Biomedical Magnetic Resonance, University of Tübingen, Tübingen, Germany.

14 <sup>6</sup>Department of Physics, University of California at San Diego, La Jolla, CA, 92093 USA.

15 <sup>7</sup>Section of Neurobiology, University of California at San Diego, La Jolla, CA, 92093 USA.

16

17

18

19

20

21

22

23

24

25

26

27 <sup>8</sup>Lead Contact:

28 Address: Max-Planck-Ring. 11, 72076, Tübingen, Germany

29 Phone: +49 7071 601-740

30 Fax: +49 7071 601-701

31 \*Correspondence: [xin.yu@tuebingen.mpg.de](mailto:xin.yu@tuebingen.mpg.de); [xyu9@mgh.harvard.edu](mailto:xyu9@mgh.harvard.edu)

32

33 **Abstract**

34 Current approaches to high-field fMRI provide two means to map hemodynamics at the  
35 level of single vessels in the brain. One is through changes in deoxyhemoglobin in  
36 venules, i.e., blood oxygenation level-dependent (BOLD) fMRI, while the second is  
37 through changes in arteriole diameter, i.e., cerebral blood volume (CBV) fMRI. Here we  
38 introduce cerebral blood flow (CBF)-fMRI, which uses high-resolution phase-contrast MRI  
39 to form velocity measurements of flow and demonstrate CBF-fMRI in single penetrating  
40 microvessels across rat parietal cortex. In contrast to the venule-dominated BOLD and  
41 arteriole-dominated CBV fMRI signal, the phase-contrast -based CBF signal changes are  
42 highly comparable from both arterioles and venules. Thus, we have developed a single-  
43 vessel fMRI platform to map the BOLD, CBV, and CBF from penetrating microvessels  
44 throughout the cortex. This high-resolution single-vessel fMRI mapping scheme not only  
45 enables the vessel-specific hemodynamic mapping in diseased animal models but also  
46 presents a translational potential to map vascular dementia in diseased or injured human  
47 brains with ultra-high field fMRI.

48

49

50

51

52

53

54

55 **Summary**

56 We established a high-resolution PC-based single-vessel velocity mapping method using  
57 the high field MRI. This PC-based micro-vessel velocity measurement enables the  
58 development of the single-vessel CBF-fMRI method. In particular, in contrast to the  
59 arteriole-dominated CBV and venule-dominated BOLD responses, the CBF-fMRI shows  
60 similar velocity changes in penetrating arterioles and venules in activated brain regions.  
61 Thus, we have built a noninvasive single-vessel fMRI mapping scheme for BOLD, CBV,  
62 and CBF hemodynamic parameter measurements in animals.

63

64

65 **Keywords: Phase contrast, cerebral blood flow, velocity, single vessel, fMRI, blood**  
66 **oxygen level-dependent, cerebral blood volume**

## 67 **Introduction**

68 Cerebral blood flow (CBF) is a key readout of neuronal processing and viability in normal  
69 and diseased brain states<sup>1</sup>. Changes in CBF may be monitored directly within individual  
70 blood vessels through the use of optical-based particle tracking techniques<sup>2</sup>. A variety of  
71 imaging methods have been developed to measure CBF across multiple spatial scales  
72 from capillary beds to the vascular network in animal brains, including multi-photon  
73 microscopy<sup>3</sup>, near-infrared spectroscopy (NIRS)<sup>4</sup>, optical coherence tomography<sup>5</sup>,  
74 optoacoustic imaging<sup>6</sup>, or laser doppler and speckle imaging<sup>7, 8</sup>. In particular, the doppler-  
75 based functional ultrasound imaging method provides a unique advantage to detect the  
76 CBF in the brain with a high spatiotemporal resolution, which can be readily applied for  
77 awake animal imaging<sup>9-11</sup>. However, these methods share a common barrier that the  
78 spectrum-specific signal transmission cannot effectively pass the skull of animals without  
79 significant loss of the signal-to-noise ratio (SNR). Typically, a craniotomy or procedure to  
80 thin the skull is needed to detect the hemodynamic signal<sup>2</sup>. While current techniques  
81 support transcranial imaging into the superficial layers of the cortex, only functional MRI  
82 (fMRI) provides a noninvasive approach for measuring hemodynamic signals throughout  
83 the brain.

84 Changes in CBF may be detected by fMRI based on arterial spin labeling (ASL),  
85 in which water protons in a major upstream vessel are spin-polarized with an external  
86 field<sup>12-14</sup>. Two other fMRI-based techniques provide indirect information about changes in  
87 CBF. Blood oxygenation level-dependent (BOLD) fMRI is used to determine changes in  
88 the ratio of deoxy- to oxyhemoglobin in the blood and is a measure of changes in brain  
89 metabolism<sup>12, 15, 16</sup>. Cerebral blood volume (CBV) fMRI is used to measure changes in

90 blood volume, i.e., essentially changes the diameter of arterioles, based on the use of  
91 exogenous or endogenous contrast agents to differentiate blood from brain tissue<sup>12, 17</sup>.

92 Phase-contrast (PC) MRI relies on gradient-oriented dephasing of magnetized  
93 protons to map the velocity, i.e., direction and speed, of blood flow<sup>18, 19</sup>. The ASL-based  
94 CBF fMRI technique detects local changes in the flow of blood through brain tissue but  
95 does not show orientation-specific information related to the alignment of vessels<sup>20</sup>. Past  
96 works with 7 T MR scanning showed that PC-MRI can be used to measure flow in the  
97 perforating arteries through the white matter or the lenticulostriate arteries in the basal  
98 ganglia of human brains<sup>21-24</sup>. However, the SNR was insufficient in these prior studies to  
99 map changes in flow, and thus changes in CBF.

100 Here, we report on a PC-MRI method to detect the vessel-specific changes in  
101 blood velocity in single trials. Compared with past implementations of PC-MRI<sup>21, 25-28</sup>, we  
102 have implemented a small surface radio frequency (RF) coil with the high field MRI, i.e.,  
103 14.1 T for improved SNR. This further allows us to map the BOLD- and CBV-fMRI from  
104 individual penetrating venules and arterioles, which span 20 to 70  $\mu\text{m}$  diameter, with high  
105 spatial resolution<sup>29-31</sup>.

## 106 **Results**

### 107 **Phantom validation of high-resolution PC-based flow velocity measurement**

108 For calibration, we constructed an *in vitro* capillary tubing circulatory system to mimic  
109 penetrating vessels, with flow rates from 1 to 10 mm/s (**Figure 1A**). A 2D PC-MRI slice is  
110 aligned perpendicular to the capillary tubing (**Figure 1A, B**) and provides a voxel-specific  
111 measurement of the flow velocity through two tubes with the upward flow (positive sign,  
112 bright dots in **Figure 1B**) and two tubes with the downward flow (negative sign, dark dots  
113 in **Figure 1B**), as well as a control tube. We observe a monotonic and near-linear relation

114 between the velocity measured by PC-MRI and the true velocity:  $V_{\text{meas}} =$   
115  $(0.67 \pm 0.01) v_{\text{pump}} + (0.02 \pm 0.11) \text{ mm/s}$  at echo time (TE) = 5.0 ms (**Figure 1C**). The  
116 small offset could be caused by eddy current effects and other gradient-related scaling  
117 errors of the PC-MRI sequence<sup>32-34</sup>. We further observe that the measured velocities are  
118 relatively insensitive to the value of TE (**Figure 1C**).

119 We implemented the high-resolution PC-MRI for *in vivo* measurement of blood flow  
120 from individual penetrating arterioles and venules through the infragranular cortex, i.e.,  
121 layer V, of the anesthetized rats with 14.1 T MR scanning. To improve the SNR of PC-  
122 MRI images as well as multi-gradient echo (MGE) images used for arteriole-venule (A-V)  
123 mapping<sup>29, 31</sup>, a surface RF transceiver coil with 6 mm diameter was constructed and  
124 attached to the rat skull (**Supplemental Figure 1**). This was essential for the high-  
125 resolution mapping with a fast sampling rate of the single-vessel flow velocity over a  
126 complete hemisphere of the rat brain (**Figure 2A and Supplemental Figure 1E**).

### 127 ***In vivo* PC-based flow velocity mapping of penetrating microvessels**

128 We first acquired the single-vessel A-V map by aligning a 500  $\mu\text{m}$  thick 2D MRI slice  
129 perpendicular to the penetrating vessels through layer V of one hemisphere (**Figure 2A,**  
130 **B**). We designed the pulse sequence for PC-MRI to achieve the same slice geometry of  
131 the A-V map so that the CBF deduced from PC-MRI signals could be overlaid with  
132 individual penetrating arterioles and venules in the single-vessel flow velocity map  
133 (**Figure 2A, C**). The arteriole blood flows down into the cortex while the venule blood  
134 flows upward, which determines the sign of the flow velocity. Vessel-specific velocities  
135 were plotted as a function of the normalized signal intensity in the A-V map and  
136 corroborated our ability to determine flow velocity specific to arterioles and venules  
137 (**Figure 2C, D**). The measured flow velocities range from 1 to 10 mm/s, as previously

138 measured with optical methods<sup>35</sup>. To probe the reliability of the single-vessel MR-based  
139 flow velocity method, we compared the velocities detected by PC-MRI methods with  
140 different TEs and flip angles (FAs) and observed comparable results across a range of  
141 parameters (**Supplemental Figure 2**). All told, these data demonstrate the feasibility of  
142 *in vivo* single-vessel blood velocity mapping with the PC-based MRI method.

### 143 **PC-based CBF-fMRI from individual arterioles and venules**

144 We contrasted the complementary capabilities of PC-based CBF-fMRI against the signals  
145 observed with the balanced steady-state free precession (bSSFP)-based single- vessel  
146 BOLD- and CBV-fMRI mapping method<sup>29</sup> (**Figure 3**). We first created an A-V map  
147 through the deep layers of the forepaw region of the primary somatosensory cortex  
148 (**Figure 3Ai**), followed by 2D-bSSFP to detect stimulus-induced changes in the single-  
149 vessel BOLD-fMRI signal (**Figure 3Aii**). We next performed single-vessel PC-MRI flow  
150 velocity measurements with 100 x100  $\mu\text{m}^2$  in-plane resolution, a sampling rate of 4 s  
151 repetition time (TR) per image, and the same geometry as the 2D-bSSFP method to  
152 measure baseline flow in penetrating arterioles and venules (**Figure 3Aiii**). Changes in  
153 CBF upon stimulation overlapped with individual penetrating vessels in the A-V map  
154 (**Figure 3Aiv**). Lastly, we performed 2D-bSSFP for single-vessel CBV-fMRI mapping by  
155 intravenous injection of iron particles into the blood in the same rats (**Figure 3Av**). The  
156 BOLD-fMRI signal is primarily detected from individual penetrating venules while the  
157 CBV-weighted signal is mainly located at the individual penetrating arterioles (dark dots  
158 in **Figure 3Aii** with bright dots in **Figure 3Av**). In contrast, the CBF-fMRI signal is  
159 observed in both penetrating arterioles and venules (**Figure 3Aiv**).

160 The stimulus-evoked responses of all three fMRI signals were studied with an  
161 on/off block design (**Figures 3B-E**). Group analysis shows that the positive BOLD signal  
162 from venule voxels is significantly higher than the arteriole-specific BOLD signal  
163 (**Figure 3C**). In contrast, the arteriole dilation leads to an earlier CBV-weighted negative  
164 fMRI signal, which is much stronger and faster than the signal from passive venule-  
165 dilation (**Figure 3C**), as expected<sup>36, 37</sup>. Group analysis shows the similar temporal  
166 dynamics of CBF changes appearing as a ramp in both arterioles and venules  
167 (**Figure 3E**). The CBF-fMRI signal appears as the integral of the stimulus, i.e., a triangular  
168 ramp (**Figure 3E**), compared to the saturation-like BOLD and CBV responses  
169 (**Figure 3C**). The voxel-wise hemodynamic changes of BOLD, CBV, and CBF are  
170 illustrated in **Supplementary Figure 3** and **movie 1**.

## 171 **Discussion**

172 Despite the existing tools developed for CBF measurement in both animal and human  
173 brains, it remains challenging to detect the flow dynamics of intracortical micro-vessels  
174 non-invasively. Here, we not only optimized the PC-MRI to map the vectorized single-  
175 vessel flow velocity of penetrating arterioles and venules but also developed the single-  
176 vessel CBF-fMRI based on the direct flow velocity measurement in rat brains. By  
177 combining with previously established single-vessel BOLD- and CBV-fMRI methods, the  
178 PC-based single-vessel CBF-fMRI method complements the scheme to map the vessel-  
179 specific hemodynamic responses with high-resolution fMRI.

180 In contrast to the conventional ASL methods, PC-based MRI mapping allows  
181 arterioles and venules to be distinguished for simultaneous velocity measurements  
182 through a 2D plane. Also, ASL has less vascular specificity because water exchange



183 through the blood-brain barrier of capillary beds increases the weighting of the ASL-based  
184 flow signal for parenchyma voxels<sup>38, 39</sup>. Furthermore, there is significant variability in the  
185 transit time to flow from arterioles to venules through the capillary bed<sup>40</sup>, which  
186 complicates the distinction of arterioles and venules by simple ASL-based CBF mapping.  
187 We detected the velocity from penetrating microvessels in the deep cortical layers with  
188 PC-MRI, showing velocity values from 1 to 5 mm/s (Fig 2). Single-digit velocity (mm/s) of  
189 red blood cells from cortical surface microvessels has been detected in the anesthetized  
190 rats using two-photon microscopy<sup>2, 35</sup>. It is noteworthy that the PC-based vessel velocity  
191 measurement is based on measuring water protons in blood but not limited to the flow of  
192 red blood cells. Still, the PC-based velocity from microvessels matches well with the  
193 previous optical measurement. We conclude that high-resolution PC-MRI is ideal for  
194 noninvasive single-vessel CBF-fMRI mapping.

195 A remaining complication with PC-MRI mapping is the presence of small offsets in  
196 velocity from the phantom capillary tubing with circulating flow under different conditions.  
197 The phase-dependent velocity encoding depends on the quality of the magnetic field  
198 gradients, and mismatched eddy currents of multiple gradients with opposite polarities,  
199 as well as the nonlinear and distorted gradient fields, could contribute to distortions in  
200 gradients<sup>32-34</sup>. In particular, the high-resolution PC-MRI method is a high-duty cycle  
201 sequence and slight heating of the gradient coil during scanning may alter the gradient  
202 performance, consistent with the baseline-drift of the CBF-fMRI signal in the first 5  
203 minutes of scanning (**Figure 3D**). Nevertheless, it should be noted that the percentage  
204 velocity changes from individual arterioles and venules can be readily detected with the  
205 PC-based CBF-fMRI measurement regardless of the gradient-heating related baseline

206 drift. Another factor that contributes to the phase-dependent velocity error originated from  
207 the limited spatial resolution of the PC-MRI images compared to the diameters of small  
208 vessels<sup>27</sup>, although corrections are possible<sup>21, 28</sup>. Despite the potential partial volume  
209 contribution to the single-vessel BOLD, CBV, and CBF-fMRI, the vessel-specific mapping  
210 scheme presents a translational potential to identify vascular dementia in diseased or  
211 injured brains with ultra-high field fMRI.

## 212 **ACKNOWLEDGMENTS**

213 We thank Dr. E. Weiler, Ms. H. Schulz, and Ms. S. Fischer for animal/lab maintenance and  
214 support, Dr. K. Buckenmaier and Dr. N. Avdievitch for technical support, and the Analysis of  
215 Functional NeuroImages (AFNI) team for their software support. This research was supported by  
216 NIH BRAIN grants R01 1NS113278 and R01 MH111438, NIH NINDS grant R35 NS097265, NIH  
217 instrument grant S10 RR023009 to the Massachusetts General Hospital/Harvard-MIT Program in  
218 Health Sciences and Technology Martinos Center, Deutsche Forschungsgemeinschaft (DFG,  
219 Germany Research Foundation) grant YU 215/3-1, SCHE 658/15, SCHE 658/12, the  
220 Bundesministerium fuer bildung und forschung (BMBF, Federal Ministry of Education and  
221 Research) grant 01GQ1702, and the Chinese Scholarship Council for the doctoral support of  
222 X. Chen.

## 223 **AUTHOR CONTRIBUTIONS**

224 X.Y. and D.K. initiated the concept; X.Y. designed the research; X.C. and X.Y. performed animal  
225 experiments; X.C., Y.J. performed data analysis; P.R., K.S., S.C. provided technical support; X.Y.,  
226 D.K., X.C., Y.J. wrote the paper.

227

228

## 229 **Methods**

### 230 **Design of a phantom capillary tubing flow system**

231 In order to validate the PC-MRI sequence, a plastic circulatory flow phantom composed  
232 of the capillary tubing (PE-10, Instech Laboratories, inner diameter 210  $\mu\text{m}$ ) was  
233 constructed to mimic the geometries of cortical blood vessels (**Figure 1A**). The capillary  
234 tube was connected to a programmable syringe infusion/withdraw pump (Pump Elite 11,  
235 Harvard Apparatus) with an infusion rate of 0.25, 0.5, 1.0, 1.5, 2.0 ml/h, which were  
236 transferred to the flow velocity of the capillary tubing as shown in **Figure 1**. The flowing  
237 medium is a manganese solution (50 mM  $\text{MnCl}_2$ , Sigma-Aldrich). The phantom tube was  
238 cast with Fomblin (Sigma-Aldrich) to avoid the potential air interface artifacts.

### 239 **Animal preparation for fMRI**

240 All surgical and experimental procedures were approved by the local authorities  
241 (Regierungspraesidium, Tübingen Referat 35, Veterinärwesen, Leiter Dr. Maas) and  
242 were in full compliance with the guidelines of the European Community (EUVD  
243 86/609/EEC) for the care and use of laboratory animals. The experimental animals were  
244 Sprague-Dawley male rats, ~ 250 g, provided by the Charles River Laboratories in  
245 Germany. Fifteen rats were used in all experiments (the evoked bSSFP-BOLD/CBV and  
246 PC-MRI signals were acquired from five of these fifteen rats).

247 Detailed descriptions of the surgery are given in previous publications<sup>29, 30</sup>. Briefly,  
248 rats were first anesthetized with isoflurane (5% induction, 1~2% maintenance), each rat  
249 was orally intubated with a mechanical ventilator (SAR-830, CWE). The femoral artery  
250 and vein were catheterized with plastic catheters (PE-50, Instech Laboratories) to monitor  
251 the arterial blood gas, administrate drugs, and constantly measure the blood pressure.

252 After catheterization, rats were secured in a stereotaxic apparatus, a custom-made RF  
253 coil was fixed above the skull with cyanoacrylate glue (454, Loctite). After surgery,  
254 isoflurane was switched off and a bolus of  $\alpha$ -chloralose (80 mg/kg, Sigma-Aldrich) was  
255 intravenously injected. A mixture of  $\alpha$ -chloralose (26.5 mg/kg/h) and the muscle relaxant  
256 (pancuronium bromide, 2 mg/kg/h) was continuously infused to maintain the anesthesia  
257 and minimize the motion artifacts. Throughout the whole experiment, the rectal  
258 temperature of rats was maintained at 37°C by using a feedback heating system. All  
259 relevant physiological parameters were constantly monitored during imaging, including  
260 heart rate, rectal temperature, arterial blood pressure, the pressure of the tidal ventilation,  
261 and end-tidal CO<sub>2</sub>. Arterial blood gases were checked to guide the physiological status  
262 adjustments by changing the respiratory volume or administering sodium bicarbonate  
263 (NaBic 8.4 %, Braun) to maintain normal pH levels. Dextran-coated iron oxide particles  
264 (15 ~ 20 mg of Fe/kg, BioPAL, MA) were intravenously injected for CBV-weighted signal  
265 acquisition.

## 266 **fMRI setup**

267 All images were acquired with a 14.1 T, 26 cm horizontal bore magnet (MagneX Scientific)  
268 interfaced through the Bruker Advance III console (Bruker Corporation). The scanner is  
269 equipped with a 12 cm magnet gradient set capable of providing a strength of 100 G/cm  
270 and a 150  $\mu$ s rise time (Resonance Research Inc.). A custom-made transceiver coil with  
271 an internal diameter of 6 mm was used for fMRI images acquisition. For the electrical  
272 stimulation, two custom-made needle electrodes were placed on the forepaw area of the  
273 rats to deliver the electrical pulse sequences (330  $\mu$ s duration at 1.0 ~ 2.0 mA. The pulses  
274 repeated at 3 Hz for 10 s) by using a stimulus isolator (A365, WPI). The stimulation  
275 duration and frequency were triggered directly through the MRI scanner which controlled

276 by Master-9 A.M.P.I system (Jerusalem, Israel). The triggering pulses from the MRI  
277 scanner were also recorded by the Biopac system (MP150, Biopac Systems, USA).

### 278 **Single-vessel multi-gradient echo (MGE) imaging**

279 To anatomically map the individual arterioles and venules penetrating the deep cortical  
280 layers of the somatosensory cortex, a 2D MGE sequence was applied with the following  
281 parameters: TR = 50 ms; TE = 2.5, 5.0, 7.5, 10.0, 12.5 and 15.0 ms; flip angle (FA) = 55°;  
282 matrix = 192 x 192; in-plane resolution = 50 x 50  $\mu\text{m}^2$ ; slice thickness = 500  $\mu\text{m}$ . The A-V  
283 map was made by averaging the MGE images from the second TE echo to the fifth TE  
284 echo. In the A-V map, the arteriole voxels show bright (red marks) due to the in-flow effect  
285 and venule voxels show as dark dots (blue marks) because of the fast  $T_2^*$  decay  
286 (**Figure 2B**).

### 287 **Balanced steady-state free precession (bSSFP) BOLD- and CBV-fMRI**

288 The bSSFP sequence was applied to acquire the evoked BOLD signals by using the  
289 following parameters: TR = 15.6 ms; TE = 7.8 ms; flip angle = 15°; matrix = 96 x 96; FOV  
290 = 9.6 x 9.6 mm; in-plane resolution = 100 x 100  $\mu\text{m}^2$ ; slice thickness = 500  $\mu\text{m}$ . For the  
291 bSSFP CBV-fMRI, the parameters were adjusted with TR = 10.4 ms and TE = 5.2 ms.  
292 The total TR to acquire each image is 1 s. To reach the steady-state, 300 dummy scans  
293 were used, followed by 25 pre-stimulation scans, one scan during stimulation, and 44  
294 post-stimulation scans with 10 epochs for each trial. The fMRI stimuli block design of each  
295 trial consisted of 10 s stimulation and 35 s inter-stimulus interval. The total acquisition  
296 duration of each trial was 7 min 55 s. CBV-weighted fMRI signals were acquired after  
297 intravenous injection of dextran-coated iron oxide particles (15 ~ 20 mg of Fe/kg, BioPAL,  
298 MA).

## 299 **Phase Contrast (PC)-MRI**

300 To measure the flow velocity of individual arterioles and venules, the PC-MRI sequence  
301 was applied with the following parameters. For the *in vitro* phantom measurement: TR =  
302 15.6 ms; TE = 4.2, 4.5, 5.0, 6.0 ms; flip angle = 25°; FOV = 6.4 x 6.4 mm; matrix =  
303 128 x 128; in-plane resolution = 50 x 50  $\mu\text{m}^2$ ; slice thickness = 500  $\mu\text{m}$ ; maximum velocity  
304 (Venc) = 1.56 or 0.66 cm/s (based on the flow values); number of averages = 172. The  
305 total acquisition time was 11 min 28 s. For the *in vivo* measurements: TR = 15.6 ms; TE  
306 = 5 ms; flip angle = 30°; FOV = 6.4 x 6.4 mm; matrix = 64 x 64; in-plane resolution = 100  
307 x 100  $\mu\text{m}^2$ ; slice thickness = 500  $\mu\text{m}$ . A total TR for each image is 4 s. The total acquisition  
308 duration of each trial was 16 min. To measure the blood flow velocity, bipolar flow  
309 encoding gradients were applied along the slice encoding direction. The slice position  
310 was anatomically identical with the slice position of the MGE imaging.

## 311 **Data analysis and statistics**

312 All data preprocessing and analysis were performed by using the software package,  
313 Analysis of Functional NeuroImages (AFNI) (NIH, Bethesda). All relevant fMRI analysis  
314 source codes can be downloaded from <https://www.afni.nimh.nih.gov/afni/>.

## 315 **Definition of the individual vessels**

316 The individual arteriole/venule voxels were defined by the signal intensity of the A-V  
317 map<sup>31</sup>. The arterioles are determined if the voxel intensities are higher than the mean  
318 signal intensities plus two times the standard deviation of the local area in a 5 x 5 kernel.  
319 The venules are determined if the voxel intensities are lower than the mean signal  
320 intensities minus two times the standard deviation of the local area<sup>29-31</sup>. The locations of  
321 individual arteriole/venule voxels defined in A-V map were used to extract the time  
322 courses of BOLD/CBV-fMRI for individual vessels.

## 323 **BOLD/CBV-fMRI and PC-MRI data analysis**

324 To register the evoked bSSFP-fMRI images and evoked PC-MRI images with the 2D  
325 anatomical A-V map, the tag-based registration method was applied. Twelve to fifteen  
326 tags were selected from the averaged bSSFP-fMRI images or the averaged PC-fMRI  
327 images to register those selected from A-V map. We used a 3dLocalstat AFNI function to  
328 normalize the signal intensity of the single-vessel maps. This process allowed us to plot  
329 the PC-based velocity values of individual vessel voxels to the normalized signal intensity  
330 of A-V maps. For the evoked signals, the bSSFP-fMRI images and PC-MRI images were  
331 normalized by scaling the baseline to 100. Multiple trials of block-design time courses  
332 were averaged for each animal. No additional smoothing step was applied. The  $\beta$ -value  
333 was calculated to measure the amplitude of the fMRI responses at each TR. The voxel-  
334 wise  $\beta$ -map was illustrated with the spatial pattern of the fMRI responses corresponding  
335 to the different time points after the stimulus onset. After registration (tag-based  
336 registration) and region of interest extraction (3dLocalstat function, mask shown in  
337 **Figure 2B**), we extracted the PC-based flow velocity values from individual vessel voxels,  
338 which were identified based on the algorithm as described in the previous section.

339 The hemodynamic response function is based on the “block function” of 3dDeconvolve  
340 module developed in AFNI. The HRF model is defined as follows:

$$341 \quad h(t) = \int_0^{\min(t,L)} s^4 e^{-s} / [4^4 e^{-4}] ds$$

342 Gamma variate function =  $s^4 e^{-s} / 4^4 e^{-4}$ . L was the duration of the response. BLOCK (L, 1)  
343 is a convolution of a square wave of duration L, makes a peak amplitude of block  
344 response = 1.

345 For the group analysis, Student's t-test was performed, error bars are displayed as the  
346 means  $\pm$  SEM. The p values  $< 0.05$  were considered statistically significant. The sample  
347 size of animal experiments is not previously estimated. No blinding and randomization  
348 design was needed in this work.

## 349 References

- 350 1. Attwell, D. et al. Glial and neuronal control of brain blood flow. *Nature* **468**, 232-243 (2010).
- 351 2. Shih, A.Y. et al. Two-photon microscopy as a tool to study blood flow and neurovascular  
352 coupling in the rodent brain. *J Cereb Blood Flow Metab* **32**, 1277-1309 (2012).
- 353 3. Kleinfeld, D., Mitra, P.P., Helmchen, F. & Denk, W. Fluctuations and stimulus-induced  
354 changes in blood flow observed in individual capillaries in layers 2 through 4 of rat  
355 neocortex. *Proceedings of the National Academy of Sciences of the United States of*  
356 *America* **95**, 15741-15746 (1998).
- 357 4. Jobsis, F.F. Noninvasive, infrared monitoring of cerebral and myocardial oxygen  
358 sufficiency and circulatory parameters. *Science* **198**, 1264-1267 (1977).
- 359 5. Srinivasan, V.J. et al. Depth-resolved microscopy of cortical hemodynamics with optical  
360 coherence tomography. *Optics letters* **34**, 3086-3088 (2009).
- 361 6. Yao, J., Maslov, K.I., Shi, Y., Taber, L.A. & Wang, L.V. In vivo photoacoustic imaging of  
362 transverse blood flow by using Doppler broadening of bandwidth. *Optics letters* **35**, 1419-  
363 1421 (2010).
- 364 7. Ances, B.M., Greenberg, J.H. & Detre, J.A. Laser doppler imaging of activation-flow  
365 coupling in the rat somatosensory cortex. *NeuroImage* **10**, 716-723 (1999).
- 366 8. Dunn, A.K., Bolay, H., Moskowitz, M.A. & Boas, D.A. Dynamic imaging of cerebral blood  
367 flow using laser speckle. *Journal of cerebral blood flow and metabolism : official journal of*  
368 *the International Society of Cerebral Blood Flow and Metabolism* **21**, 195-201 (2001).
- 369 9. Mace, E. et al. Functional ultrasound imaging of the brain. *Nature methods* **8**, 662-664  
370 (2011).
- 371 10. Sieu, L.A. et al. EEG and functional ultrasound imaging in mobile rats. *Nature methods*  
372 **12**, 831-834 (2015).
- 373 11. Rungta, R.L., Osmanski, B.F., Boido, D., Tanter, M. & Charpak, S. Light controls cerebral  
374 blood flow in naive animals. *Nature communications* **8**, 14191 (2017).
- 375 12. Kwong, K.K. et al. Dynamic magnetic resonance imaging of human brain activity during  
376 primary sensory stimulation. *Proceedings of the National Academy of Sciences of the*  
377 *United States of America* **89**, 5675-5679 (1992).
- 378 13. Detre, J.A., Leigh, J.S., Williams, D.S. & Koretsky, A.P. Perfusion imaging. *Magnetic*  
379 *resonance in medicine : official journal of the Society of Magnetic Resonance in Medicine*  
380 */ Society of Magnetic Resonance in Medicine* **23**, 37-45 (1992).
- 381 14. Williams, D.S., Detre, J.A., Leigh, J.S. & Koretsky, A.P. Magnetic resonance imaging of  
382 perfusion using spin inversion of arterial water. *Proceedings of the National Academy of*  
383 *Sciences of the United States of America* **89**, 212-216 (1992).
- 384 15. Ogawa, S., Lee, T.M., Kay, A.R. & Tank, D.W. Brain magnetic resonance imaging with  
385 contrast dependent on blood oxygenation. *Proceedings of the National Academy of*  
386 *Sciences of the United States of America* **87**, 9868-9872 (1990).
- 387 16. Ogawa, S. et al. Intrinsic signal changes accompanying sensory stimulation: functional  
388 brain mapping with magnetic resonance imaging. *Proceedings of the National Academy*  
389 *of Sciences of the United States of America* **89**, 5951-5955 (1992).



- 390 17. Belliveau, J.W. et al. Functional mapping of the human visual cortex by magnetic  
391 resonance imaging. *Science* **254**, 716-719 (1991).
- 392 18. Moran, P.R. A flow velocity zeugmatographic interlace for NMR imaging in humans.  
393 *Magnetic resonance imaging* **1**, 197-203 (1982).
- 394 19. Bryant, D.J., Payne, J.A., Firmin, D.N. & Longmore, D.B. Measurement of flow with NMR  
395 imaging using a gradient pulse and phase difference technique. *Journal of computer*  
396 *assisted tomography* **8**, 588-593 (1984).
- 397 20. Detre, J.A. & Wang, J. Technical aspects and utility of fMRI using BOLD and ASL. *Clin*  
398 *Neurophysiol* **113**, 621-634 (2002).
- 399 21. Zong, X. & Lin, W. Quantitative phase contrast MRI of penetrating arteries in centrum  
400 semiovale at 7T. *NeuroImage* **195**, 463-474 (2019).
- 401 22. Bouvy, W.H. et al. Assessment of blood flow velocity and pulsatility in cerebral perforating  
402 arteries with 7-T quantitative flow MRI. *NMR in biomedicine* **29**, 1295-1304 (2016).
- 403 23. Kang, C.K. et al. Velocity measurement of microvessels using phase-contrast magnetic  
404 resonance angiography at 7 Tesla MRI. *Magnetic resonance in medicine : official journal*  
405 *of the Society of Magnetic Resonance in Medicine / Society of Magnetic Resonance in*  
406 *Medicine* **75**, 1640-1646 (2016).
- 407 24. Schnerr, R.S. et al. Pulsatility of Lenticulostriate Arteries Assessed by 7 Tesla Flow MRI-  
408 Measurement, Reproducibility, and Applicability to Aging Effect. *Front Physiol* **8**, 961  
409 (2017).
- 410 25. Wei, Z. et al. Optimization of phase-contrast MRI for the estimation of global cerebral blood  
411 flow of mice at 11.7T. *Magnetic resonance in medicine : official journal of the Society of*  
412 *Magnetic Resonance in Medicine / Society of Magnetic Resonance in Medicine* **81**, 2566-  
413 2575 (2019).
- 414 26. Dolui, S. et al. Comparison of non-invasive MRI measurements of cerebral blood flow in  
415 a large multisite cohort. *Journal of cerebral blood flow and metabolism : official journal of*  
416 *the International Society of Cerebral Blood Flow and Metabolism* **36**, 1244-1256 (2016).
- 417 27. Geurts, L.J. et al. Vascular reactivity in small cerebral perforating arteries with 7T phase  
418 contrast MRI - A proof of concept study. *NeuroImage* **172**, 470-477 (2018).
- 419 28. Hoogeveen, R.M., Bakker, C.J. & Viergever, M.A. MR phase-contrast flow measurement  
420 with limited spatial resolution in small vessels: value of model-based image analysis.  
421 *Magnetic resonance in medicine : official journal of the Society of Magnetic Resonance in*  
422 *Medicine / Society of Magnetic Resonance in Medicine* **41**, 520-528 (1999).
- 423 29. He, Y. et al. Ultra-Slow Single-Vessel BOLD and CBV-Based fMRI Spatiotemporal  
424 Dynamics and Their Correlation with Neuronal Intracellular Calcium Signals. *Neuron* **97**,  
425 925-939 e925 (2018).
- 426 30. Chen, X. et al. Mapping optogenetically-driven single-vessel fMRI with concurrent  
427 neuronal calcium recordings in the rat hippocampus. *Nature communications* **10**, 5239  
428 (2019).
- 429 31. Yu, X. et al. Sensory and optogenetically driven single-vessel fMRI. *Nature methods* **13**,  
430 337-340 (2016).
- 431 32. Walker, P.G. et al. Semiautomated method for noise reduction and background phase  
432 error correction in MR phase velocity data. *Journal of magnetic resonance imaging : JMIRI*  
433 **3**, 521-530 (1993).
- 434 33. Peeters, J.M., Bos, C. & Bakker, C.J. Analysis and correction of gradient nonlinearity and  
435 B0 inhomogeneity related scaling errors in two-dimensional phase contrast flow  
436 measurements. *Magnetic resonance in medicine : official journal of the Society of*  
437 *Magnetic Resonance in Medicine / Society of Magnetic Resonance in Medicine* **53**, 126-  
438 133 (2005).

- 439 34. Bernstein, M.A. et al. Concomitant gradient terms in phase contrast MR: analysis and  
440 correction. *Magnetic resonance in medicine : official journal of the Society of Magnetic*  
441 *Resonance in Medicine / Society of Magnetic Resonance in Medicine* **39**, 300-308 (1998).  
442 35. Schaffer, C.B. et al. Two-photon imaging of cortical surface microvessels reveals a robust  
443 redistribution in blood flow after vascular occlusion. *PLoS Biol* **4**, e22 (2006).  
444 36. Silva, A.C., Koretsky, A.P. & Duyn, J.H. Functional MRI impulse response for BOLD and  
445 CBV contrast in rat somatosensory cortex. *Magnet Reson Med* **57**, 1110-1118 (2007).  
446 37. Drew, P.J., Shih, A.Y. & Kleinfeld, D. Fluctuating and sensory-induced vasodynamics in  
447 rodent cortex extend arteriole capacity. *Proc. Natl. Acad. Sci. USA* **108**, 8473-8478 (2011).  
448 38. Koretsky, A.P. Early development of arterial spin labeling to measure regional brain blood  
449 flow by MRI. *NeuroImage* **62**, 602-607 (2012).  
450 39. Wang, J., Fernandez-Seara, M.A., Wang, S. & St Lawrence, K.S. When perfusion meets  
451 diffusion: in vivo measurement of water permeability in human brain. *Journal of cerebral*  
452 *blood flow and metabolism : official journal of the International Society of Cerebral Blood*  
453 *Flow and Metabolism* **27**, 839-849 (2007).  
454 40. Hutchinson, E.B., Stefanovic, B., Koretsky, A.P. & Silva, A.C. Spatial flow-volume  
455 dissociation of the cerebral microcirculatory response to mild hypercapnia. *NeuroImage*  
456 **32**, 520-530 (2006).

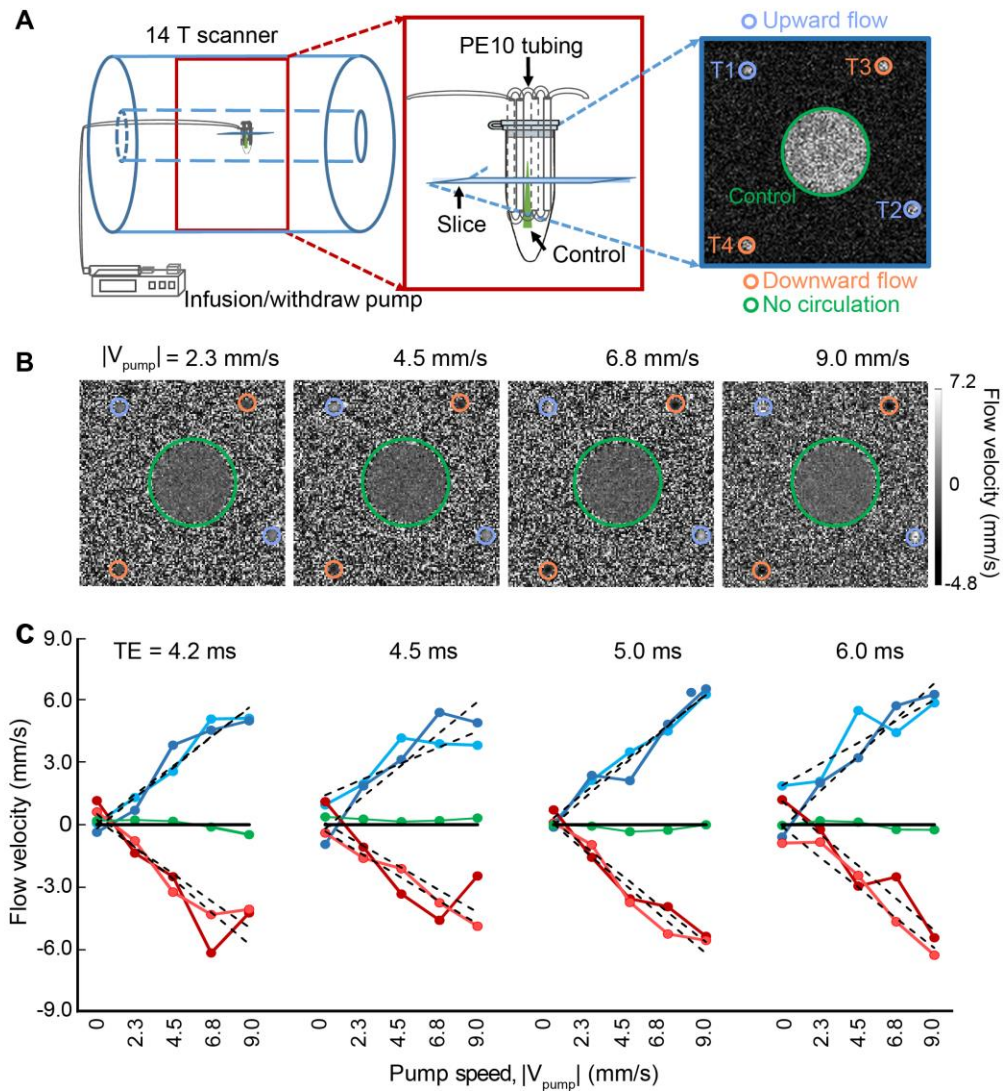

474 **Figure 1. *In vitro* flow velocity measurements with phase-contrast (PC)-MRI.** A. Schematic  
475 drawing of the phantom experimental flow chamber in the 14.1 T scanner. An expanded image  
476 (red box) shows the circulatory system constructed of capillary tubes. A representative fast low  
477 angle shot (FLASH) MRI image (blue box), 500  $\mu\text{m}$  in thickness, shows the capillary positions.  
478 regions of interest (ROIs) T1 and T2, contoured in purple, indicate the upward flow. ROIs T3 and  
479 T4, in orange contour, indicate the downward flow. The green contour indicates the stagnant fluid.  
480 **B.** Representative images with different flow velocity in the capillaries T1 to T4 in panel A. (echo  
481 time) TE = 5.0 ms for all panels. **C.** The plot of flow velocity estimates from the five ROIs with  
482 different TEs, as marked, and different pump rates, as indicated and marked in panel B. The  
483 dotted lines correspond to a linear fitting for velocity measurements of different ROIs.

484

485

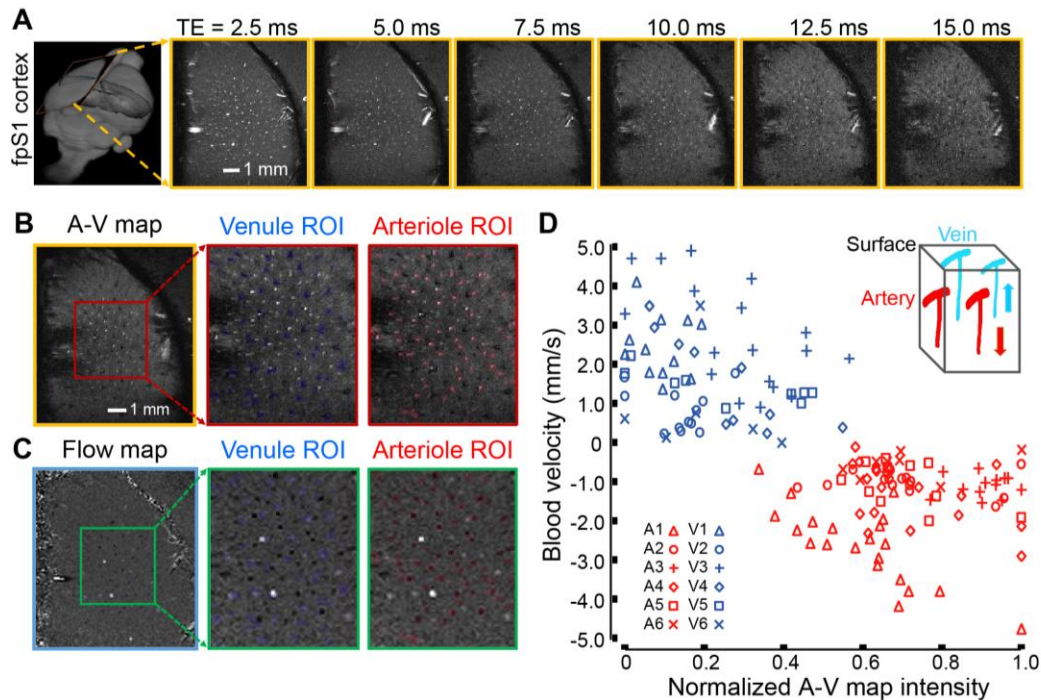

486

487 **Figure 2. Single-vessel flow velocity measurement.** **A.** Representative 2D multi-gradient echo  
488 (MGE) slices (yellow boxes) from a deep layer of the primary forepaw somatosensory cortex (first  
489 frame) at different TEs, as indicated. **B.** The 2D arteriole-venule (A-V) map (yellow box) derived  
490 from the images with different TEs in panel A, arterioles and venules appear as bright and dark  
491 voxels, respectively. The expanded views (red boxes) show individual venules, i.e., black voxels  
492 marked in blue, and arterioles, i.e., white voxels marked in red. **C.** The vectorized flow velocity  
493 map (blue box) from the same 2D MGE slice in panel B. The expanded views (green boxes) show  
494 the individual venules, i.e., white dots with positive velocity, and arterioles, i.e., black dots with  
495 negative velocity. Note that 2 bright dots are caused by the “over-flowed” velocity beyond the  
496 maximal velocity, i.e., the velocity encoding ( $V_{enc}$ ) parameter, defined in the PC-MRI sequence,  
497 which could be not correctly estimated. **D.** Scatter plot of the flow velocities from individual  
498 arterioles and venules as the function of the normalized signal intensities of each vessel in the A-  
499 V map of panel B, data from 6 rats as indicated. Insert shows the blood flow direction of arterioles  
500 and venules in the forepaw somatosensory cortical region.

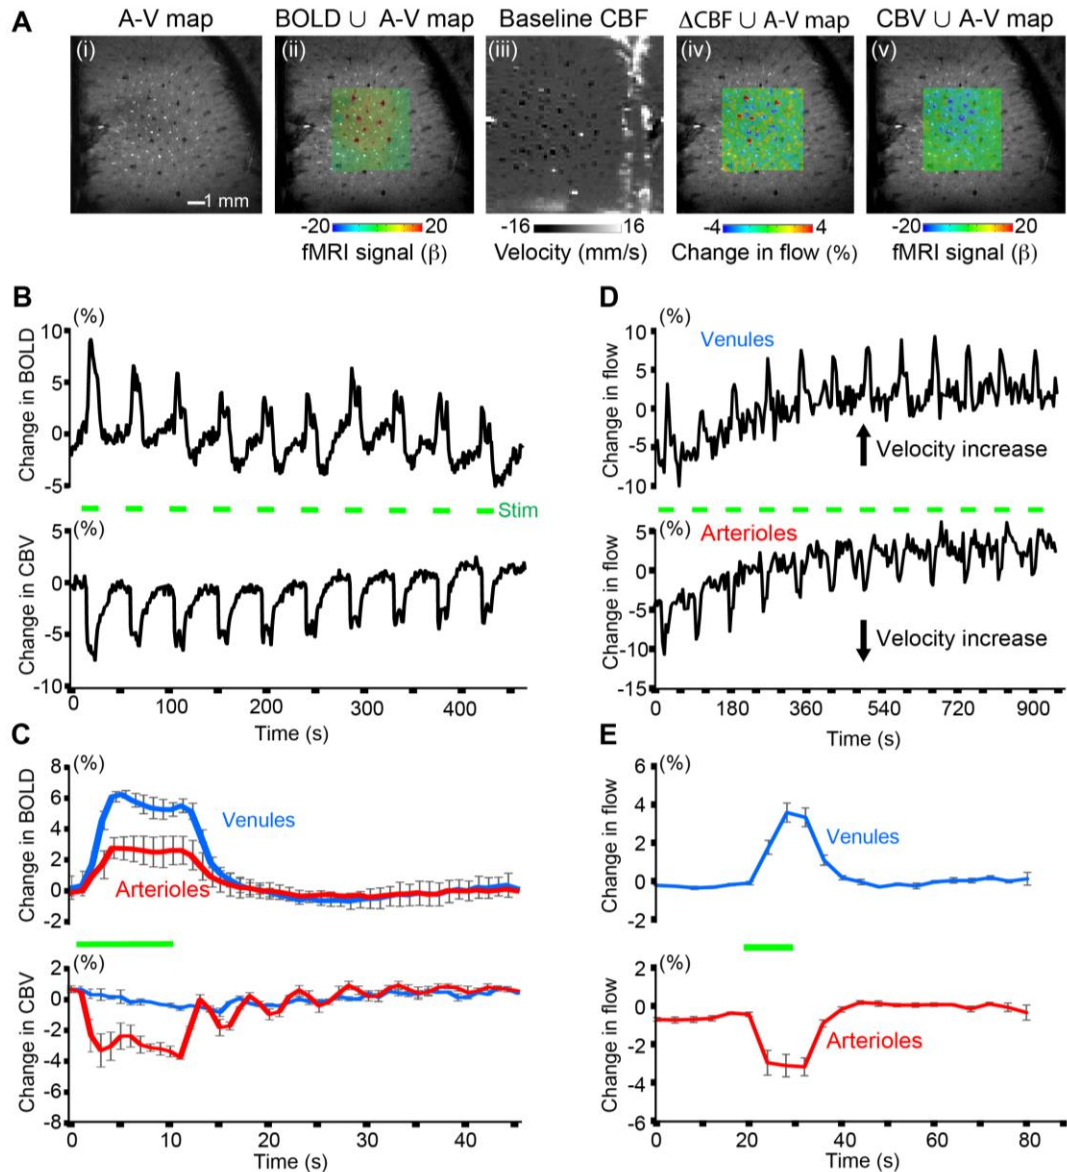

501  
 502 **Figure 3. Maps of task-related hemodynamic signals with BOLD, CBV, and CBF-fMRI. A.**  
 503 Different MRI measurement strategies on the same 2D slice. From left to right: (i) The single-  
 504 vessel A-V map acquired with the MGE method; (ii) The evoked balanced steady-state free  
 505 precession (bSSFP)-based BOLD-fMRI signal, within the green subregion, on top of the A-V map;  
 506 (iii) the PC-MRI map of baseline CBF; (iv) the change in CBF on top of the A-V map with an  
 507 increased flow velocity corresponding to brighter voxels for venules and darker voxels for  
 508 arterioles; and (v) the evoked bSSFP-based CBV-fMRI signal on top of the A-V map. **B.** The time  
 509 courses of the evoked bSSFP-BOLD and CBV-fMRI with the block-design paradigm from the  
 510 venules and arterioles shown in panel A. Forepaw stimulation pulse of 330  $\mu$ s in width and 1 mA  
 511 in amplitude delivered at 3 Hz for 10 s. **C.** The averaged time courses of the fractional change for

512 the evoked BOLD and CBV signals from the venule and arteriole ROIs from different rats (mean  
513  $\pm$  SEM, the green bar shows stimulation duration). The peak BOLD values of venule are  
514 significantly higher than those of arteriole (5 rats,  $p = 0.009$ ), while the peak CBV values of  
515 arteriole are significantly higher than those of venule (3 rats,  $p = 0.028$ ). **D.** The time courses of  
516 the evoked CBF changes from the arteriole and venule ROIs show increased velocity from both  
517 arterioles and venules with the block–design, 10 s duration stimulation paradigm. **E.** The  
518 averaged time courses of the evoked CBF changes show the velocity increase from both arteriole  
519 and venule ROIs with the block–design stimulation paradigm from 4 rats (mean  $\pm$  SEM, the green  
520 bar shows stimulation duration).

521  
522  
524  
525  
526  
527  
528  
529

## Supporting information

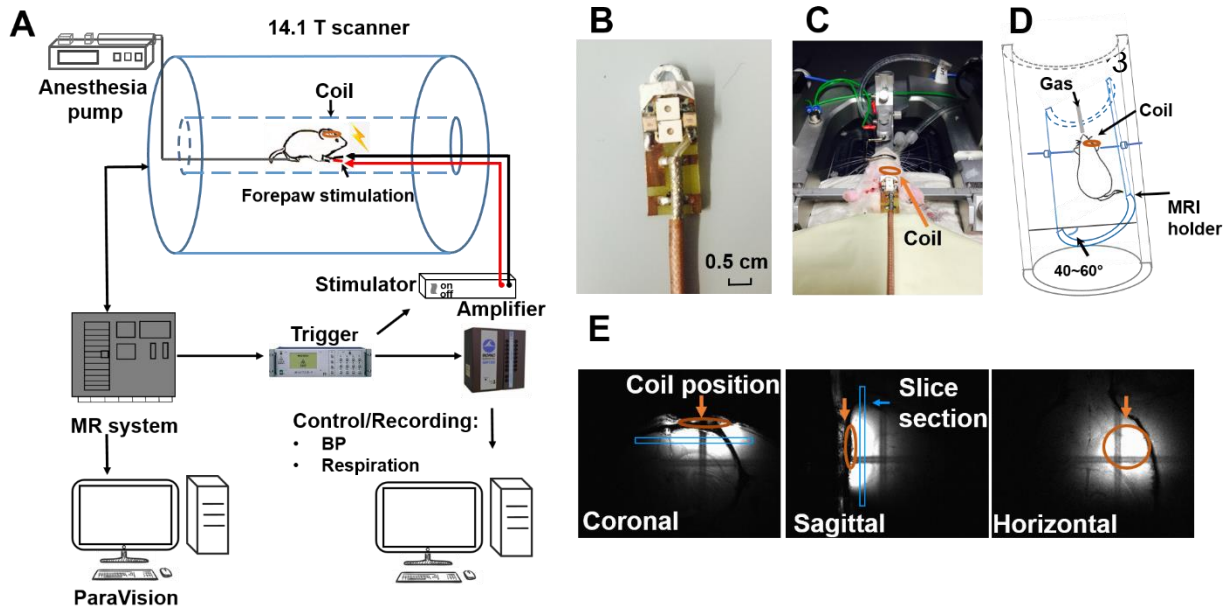

**Figure S1. The preparation of *in vivo* experiment for the PC-MRI in 14.1 T.**

- A.** The flow chart of the *in vivo* experiment in the 14.1 T scanner.
- B.** Photograph of the custom-made transceiver surface RF coil.
- C.** Photograph of the coil position: the coil is glued to the rat skull.
- D.** The schematic drawing of the rat position inside the MRI holder.
- E.** Representative images from different views of the FLASH MRI show the ideal coil position.

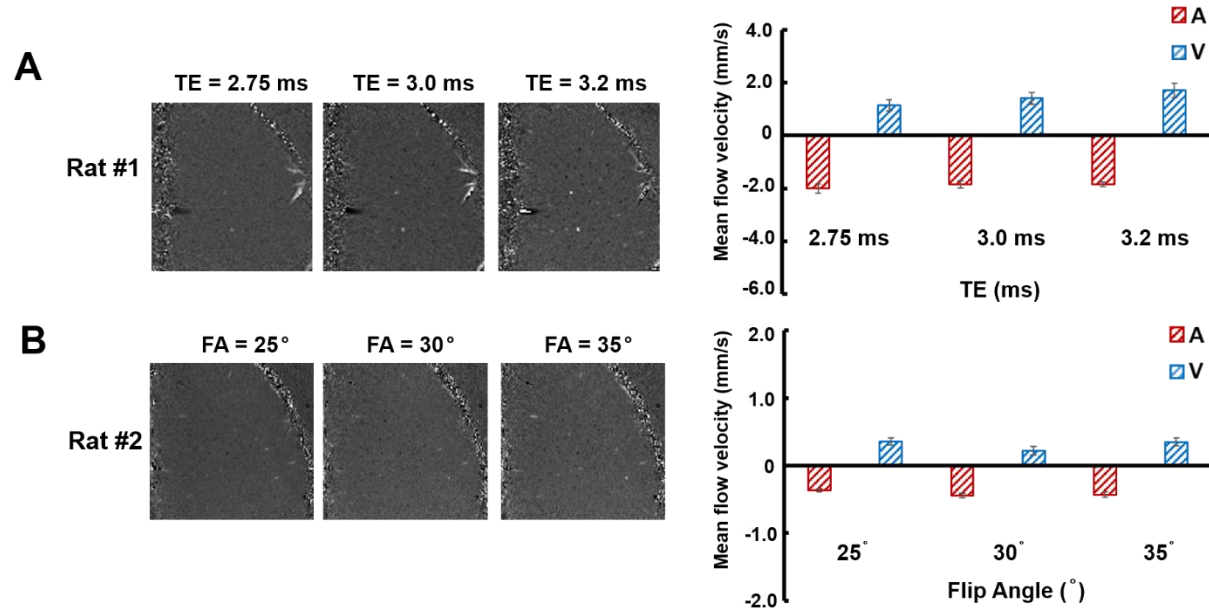

**Figure S2. Phase images from the different representative rats with different TEs and flip angles.**

**A.** Phase images from a representative rat with different TEs, i.e., 2.75, 3.0, and 3.2 ms. The right panel shows the mean blood flow velocity (mean  $\pm$  SEM) from left images with  $N_{\text{Arteriole}} = 48$  and  $N_{\text{Venule}} = 22$ .

**B.** Phase images from a representative rat with different flip angles, i.e., 25°, 30°, and 35°. The right panel shows the mean blood flow velocity from left images with  $N_{\text{Arteriole}} = 38$  and  $N_{\text{Venule}} = 14$ .



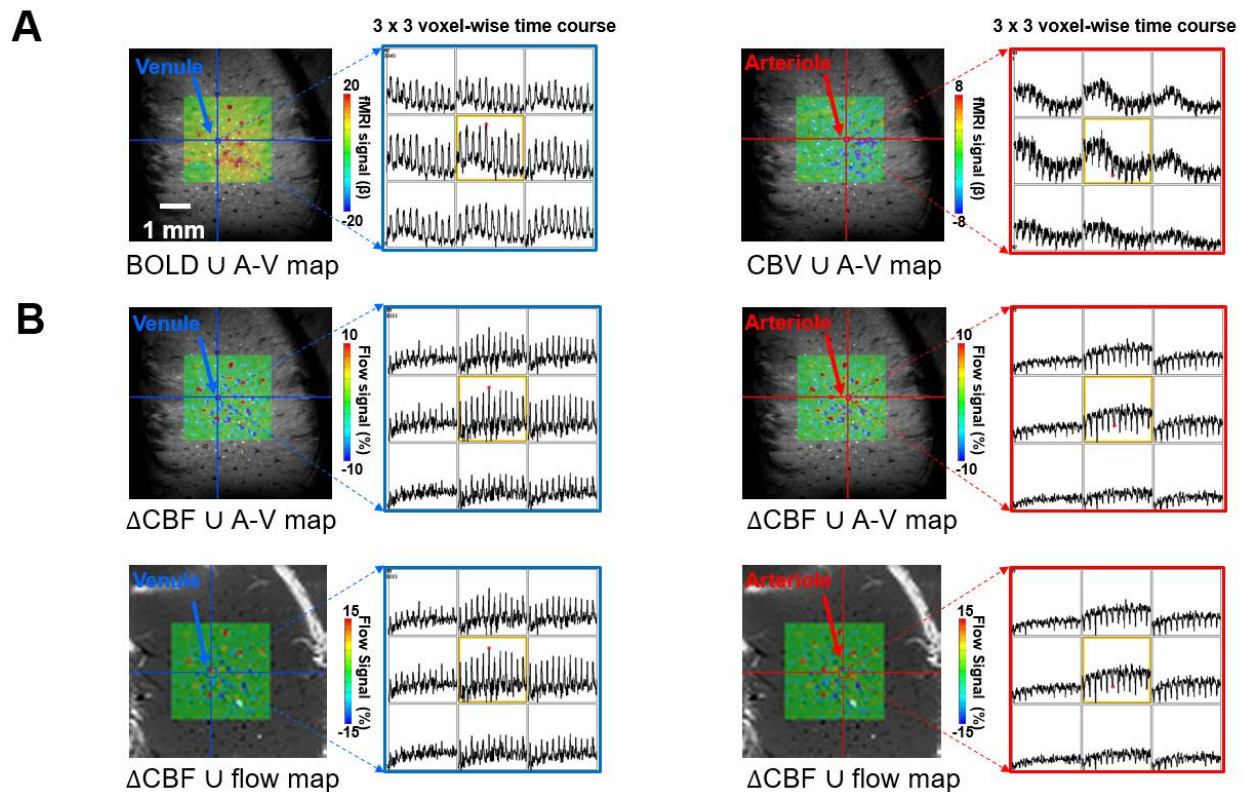

**Figure S3. The bSSFP-based single-vessel BOLD/CBV-fMRI and the PC-MRI based single-vessel dynamic flow measurement from a representative rat.**

**A.** The evoked bSSFP-based BOLD- (left) and CBV- (right) fMRI maps overlaid on the same A-V map from a representative rat, with the voxel-wise time courses from the ROIs of individual venule (blue arrow) and arteriole (red arrow) (10 s on and 35 s off for 10 epochs plotted in a 3 x 3 matrix).

**B.** The evoked CBF maps overlaid on both A-V map (upper panel) and PC-based flow map (lower panel) from the same representative rat. The voxel-wise time courses of CBF changes from the same ROIs of individual venule (blue arrow) and arteriole (red arrow) (10 s on and 50 s off for 12 epochs plotted in a 3 x 3 matrix).

## Supplementary Movie Legends

### Movie 1. The bSSFP-based single-vessel BOLD/CBV-fMRI and the PC-MRI based single-vessel dynamic flow measurement in the rat cortex.

The upper panel shows the evoked bSSFP-based BOLD- (left) and CBV- (right) fMRI maps overlaid on the 2D A-V map with  $50 \times 50 \mu\text{m}^2$  in-plane and the time course from a single voxel located at a representative venule (blue arrow) and arteriole (red arrow) (10 s on and 35 s off for a total of 45 s time window with TR = 1 s). The middle panel shows the evoked CBF maps overlaid on the same 2D A-V map from the same individual venule (left) and arteriole (right), of which the CBF-fMRI maps were registered to match the 2D A-V map at the  $50 \times 50 \mu\text{m}^2$  resolution, as well as the time courses of the PC-based flow velocity dynamic changes from same voxels identified as the upper panel (10 s on and 50 s off for a total of 60 s time window with TR = 4 s). The lower panel shows the evoked CBF maps overlaid on the PC-based flow map with  $100 \times 100 \mu\text{m}^2$  resolution and the time course from the voxels located at the representative venule (left) and arteriole (right). Note that the venule is a bright voxel and arteriole is a dark voxel in the flow map, which is opposite to the A-V map and also the slightly different time course due to the altered spatial resolution.

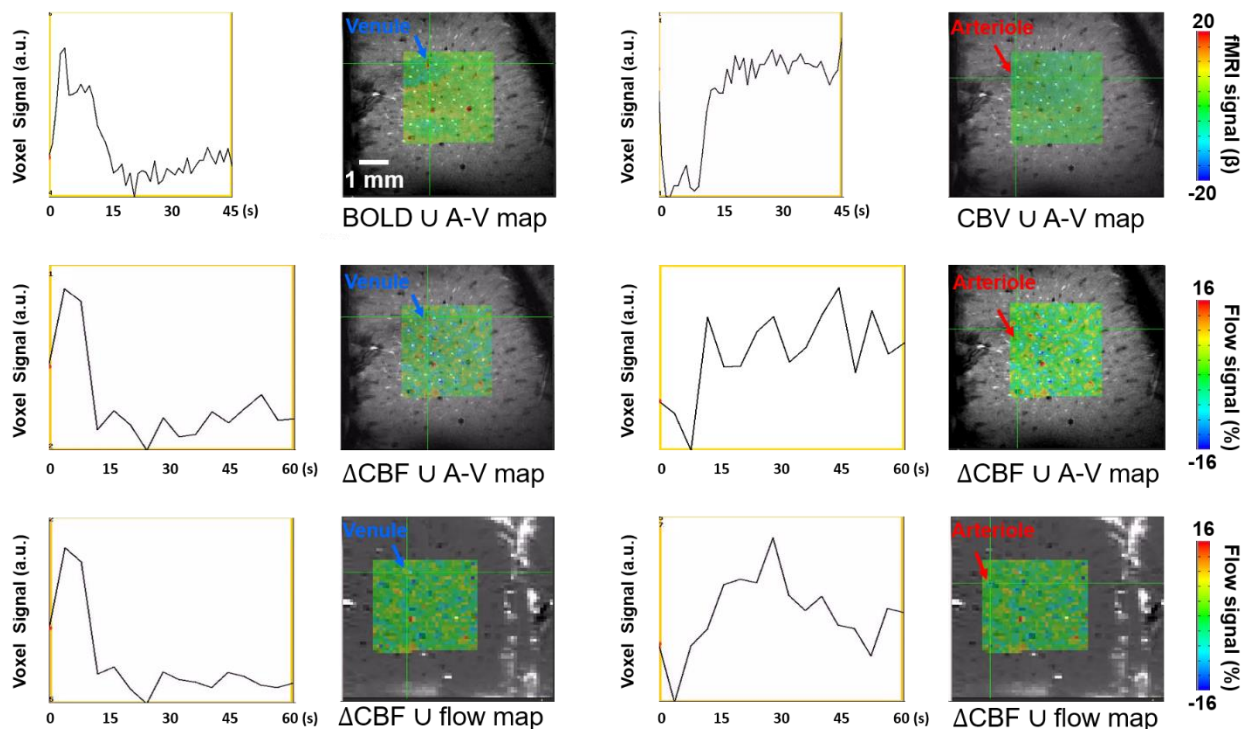

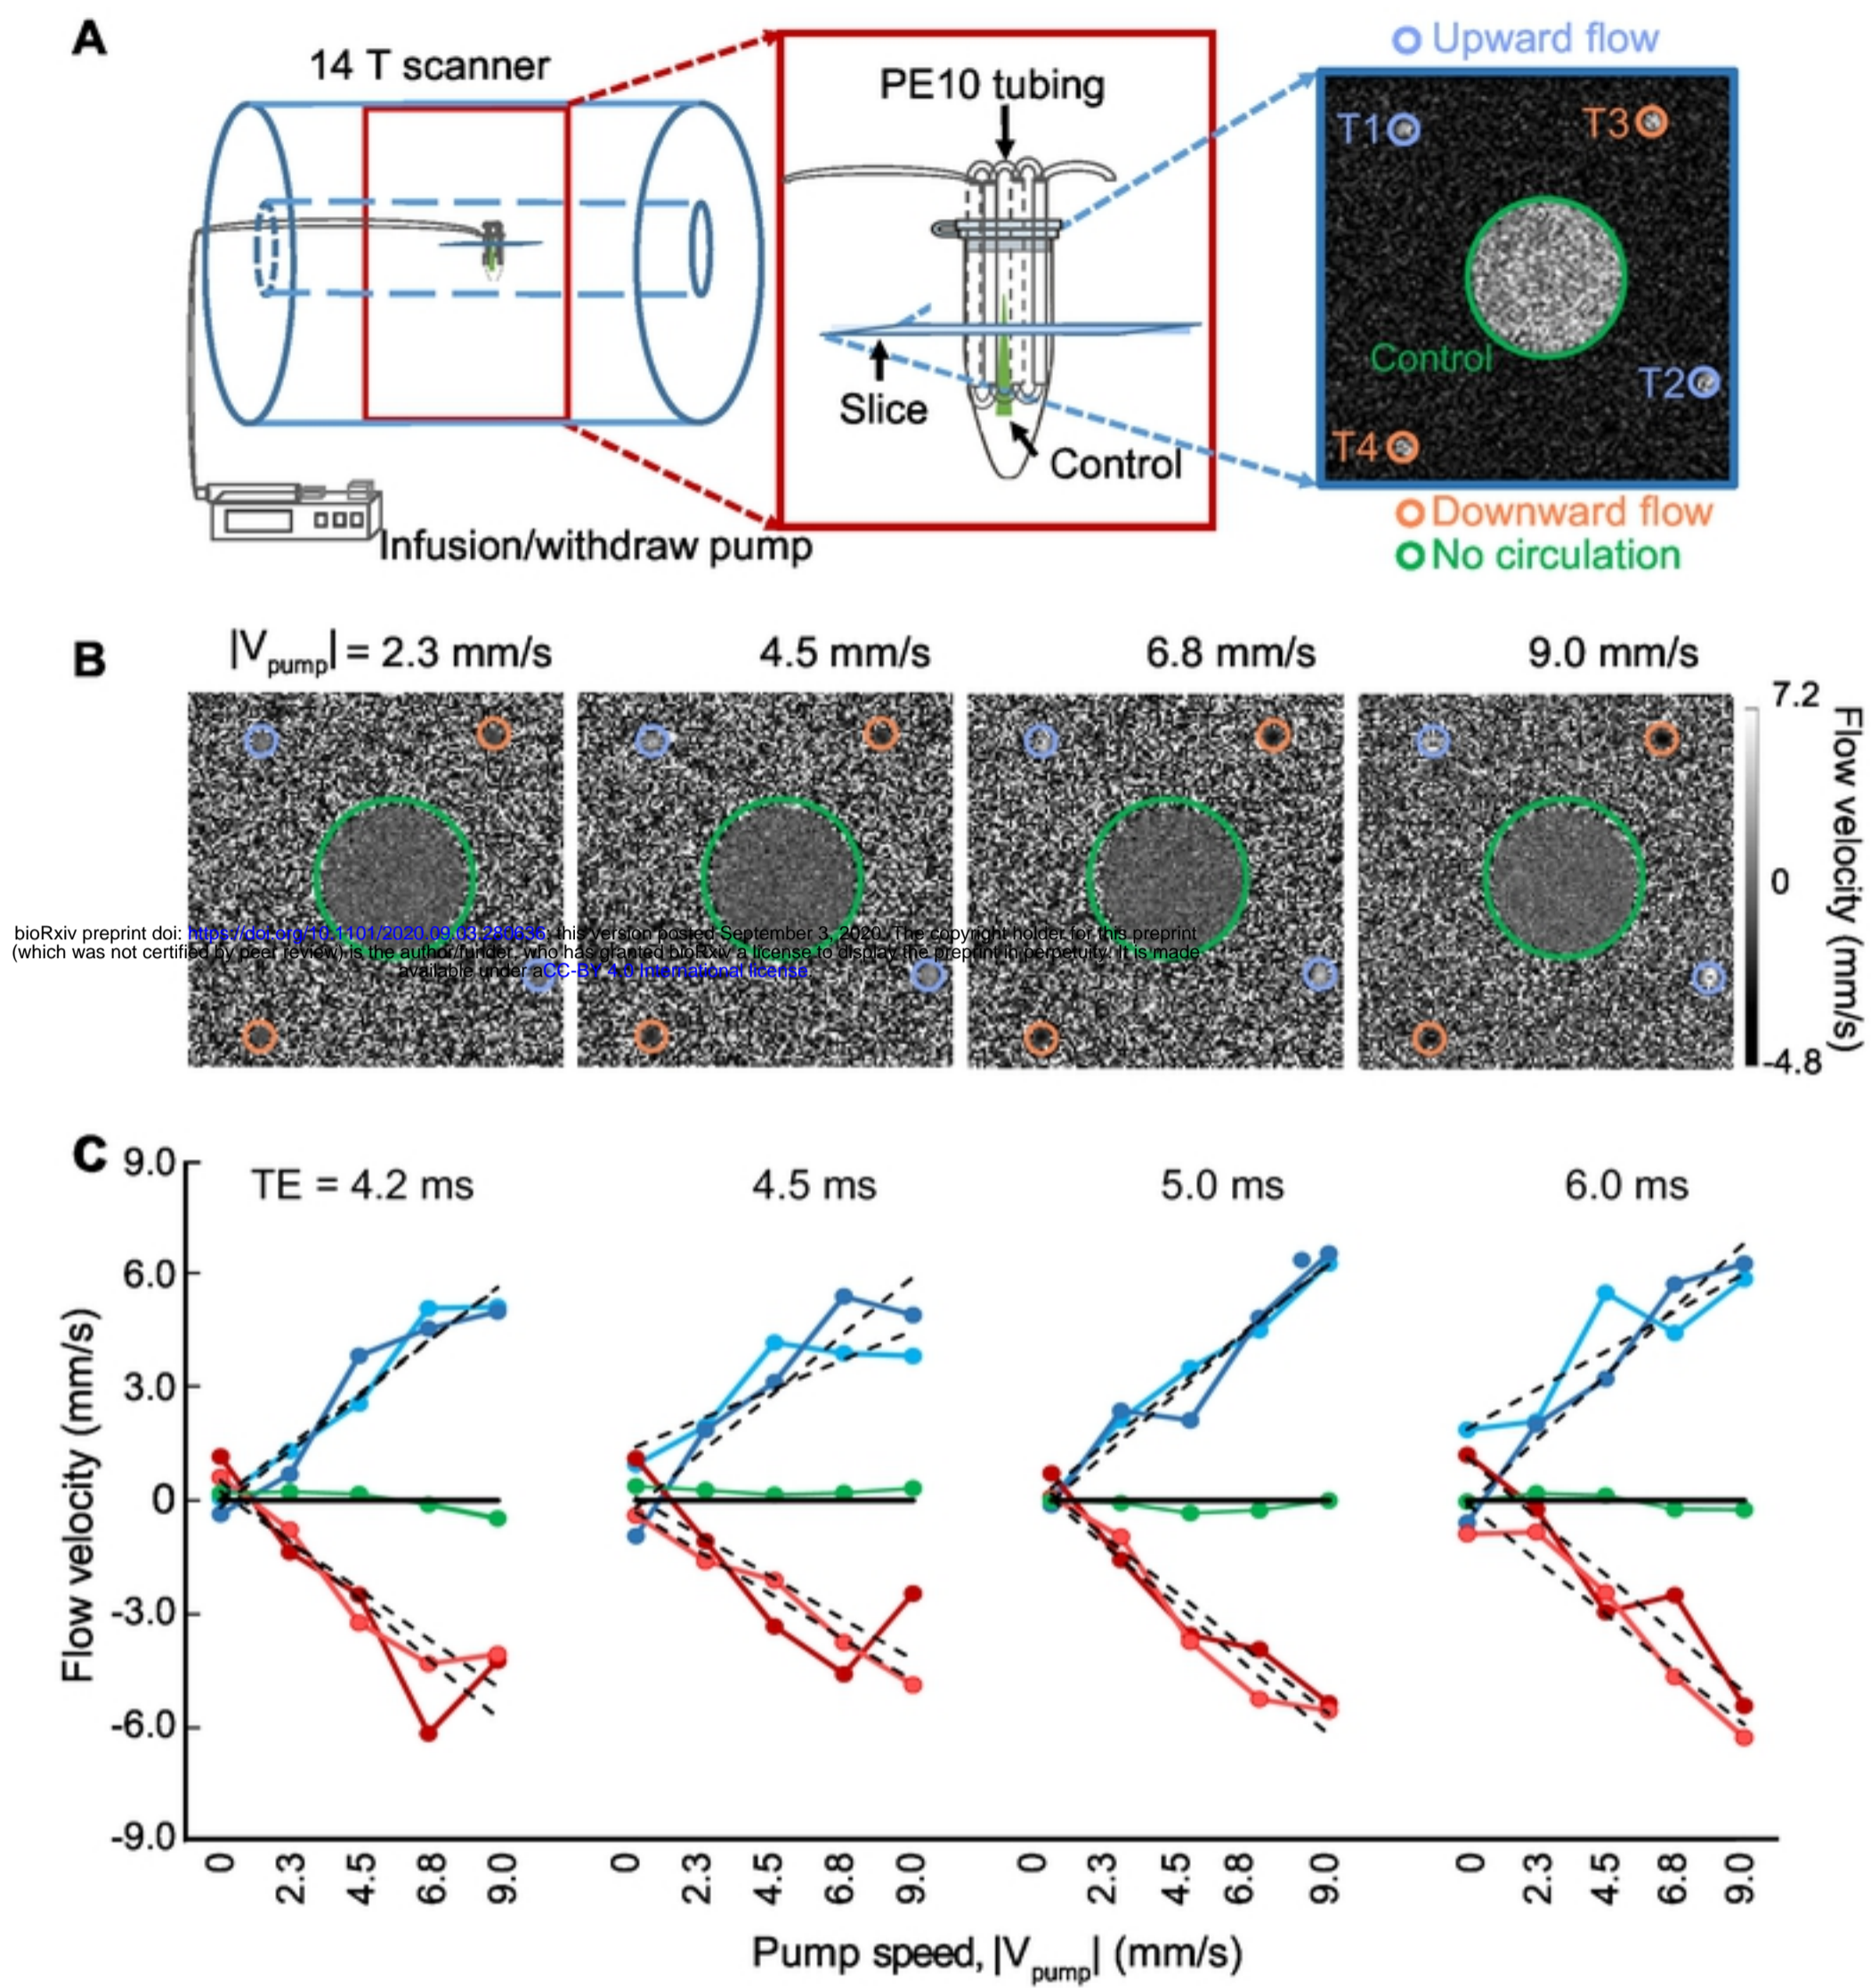

Figure 1. Chen, Jiang, Choi, Pohmann, Scheffler, Kleinfeld and Yu

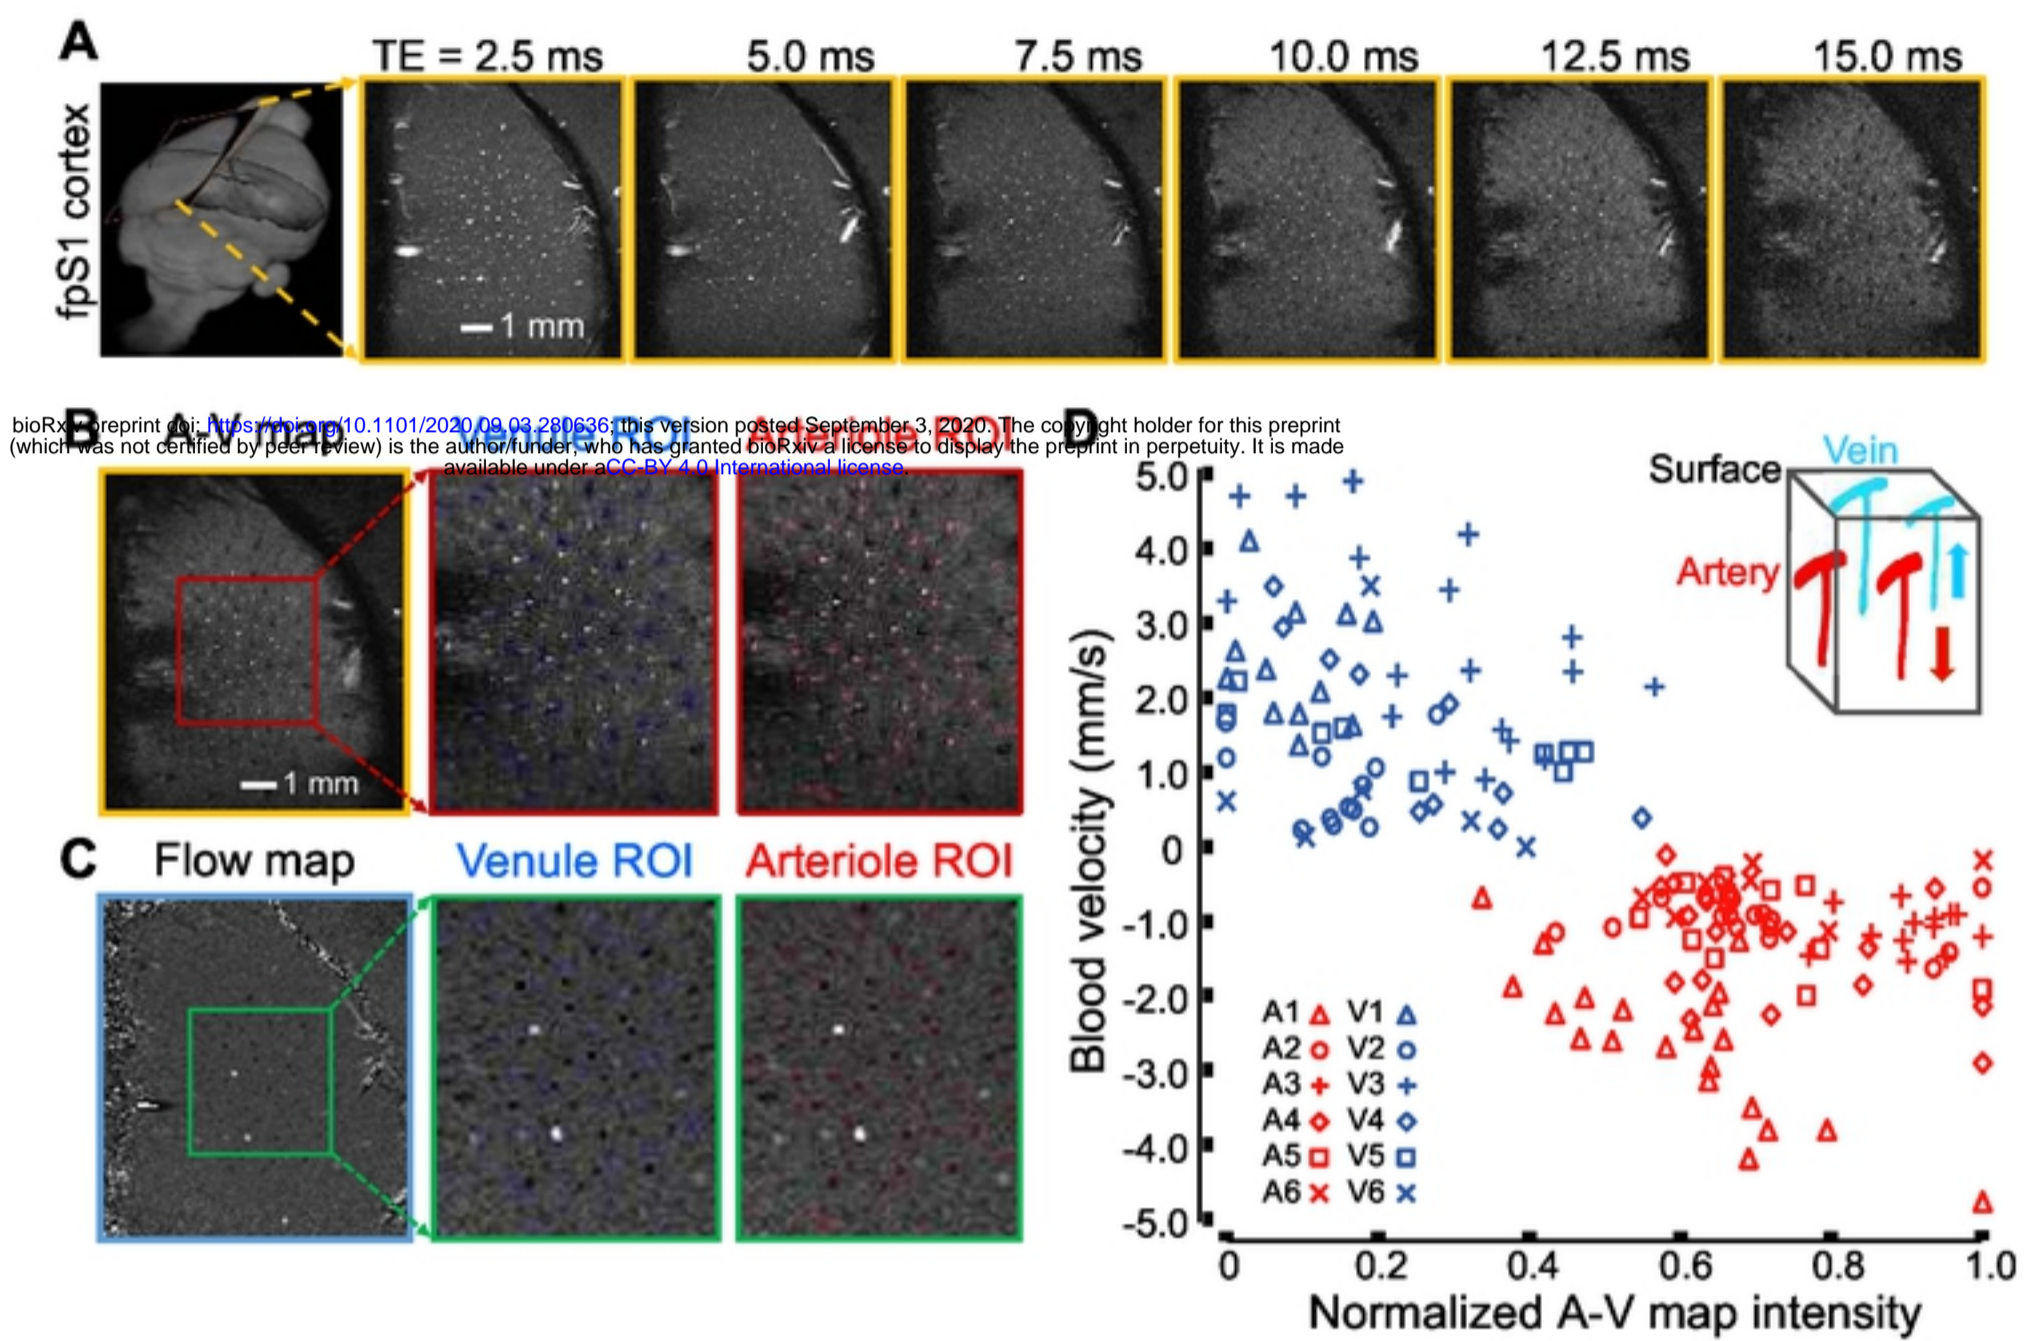

Figure 2. Chen, Jiang, Choi, Pohmann, Scheffler, Kleinfeld and Yu

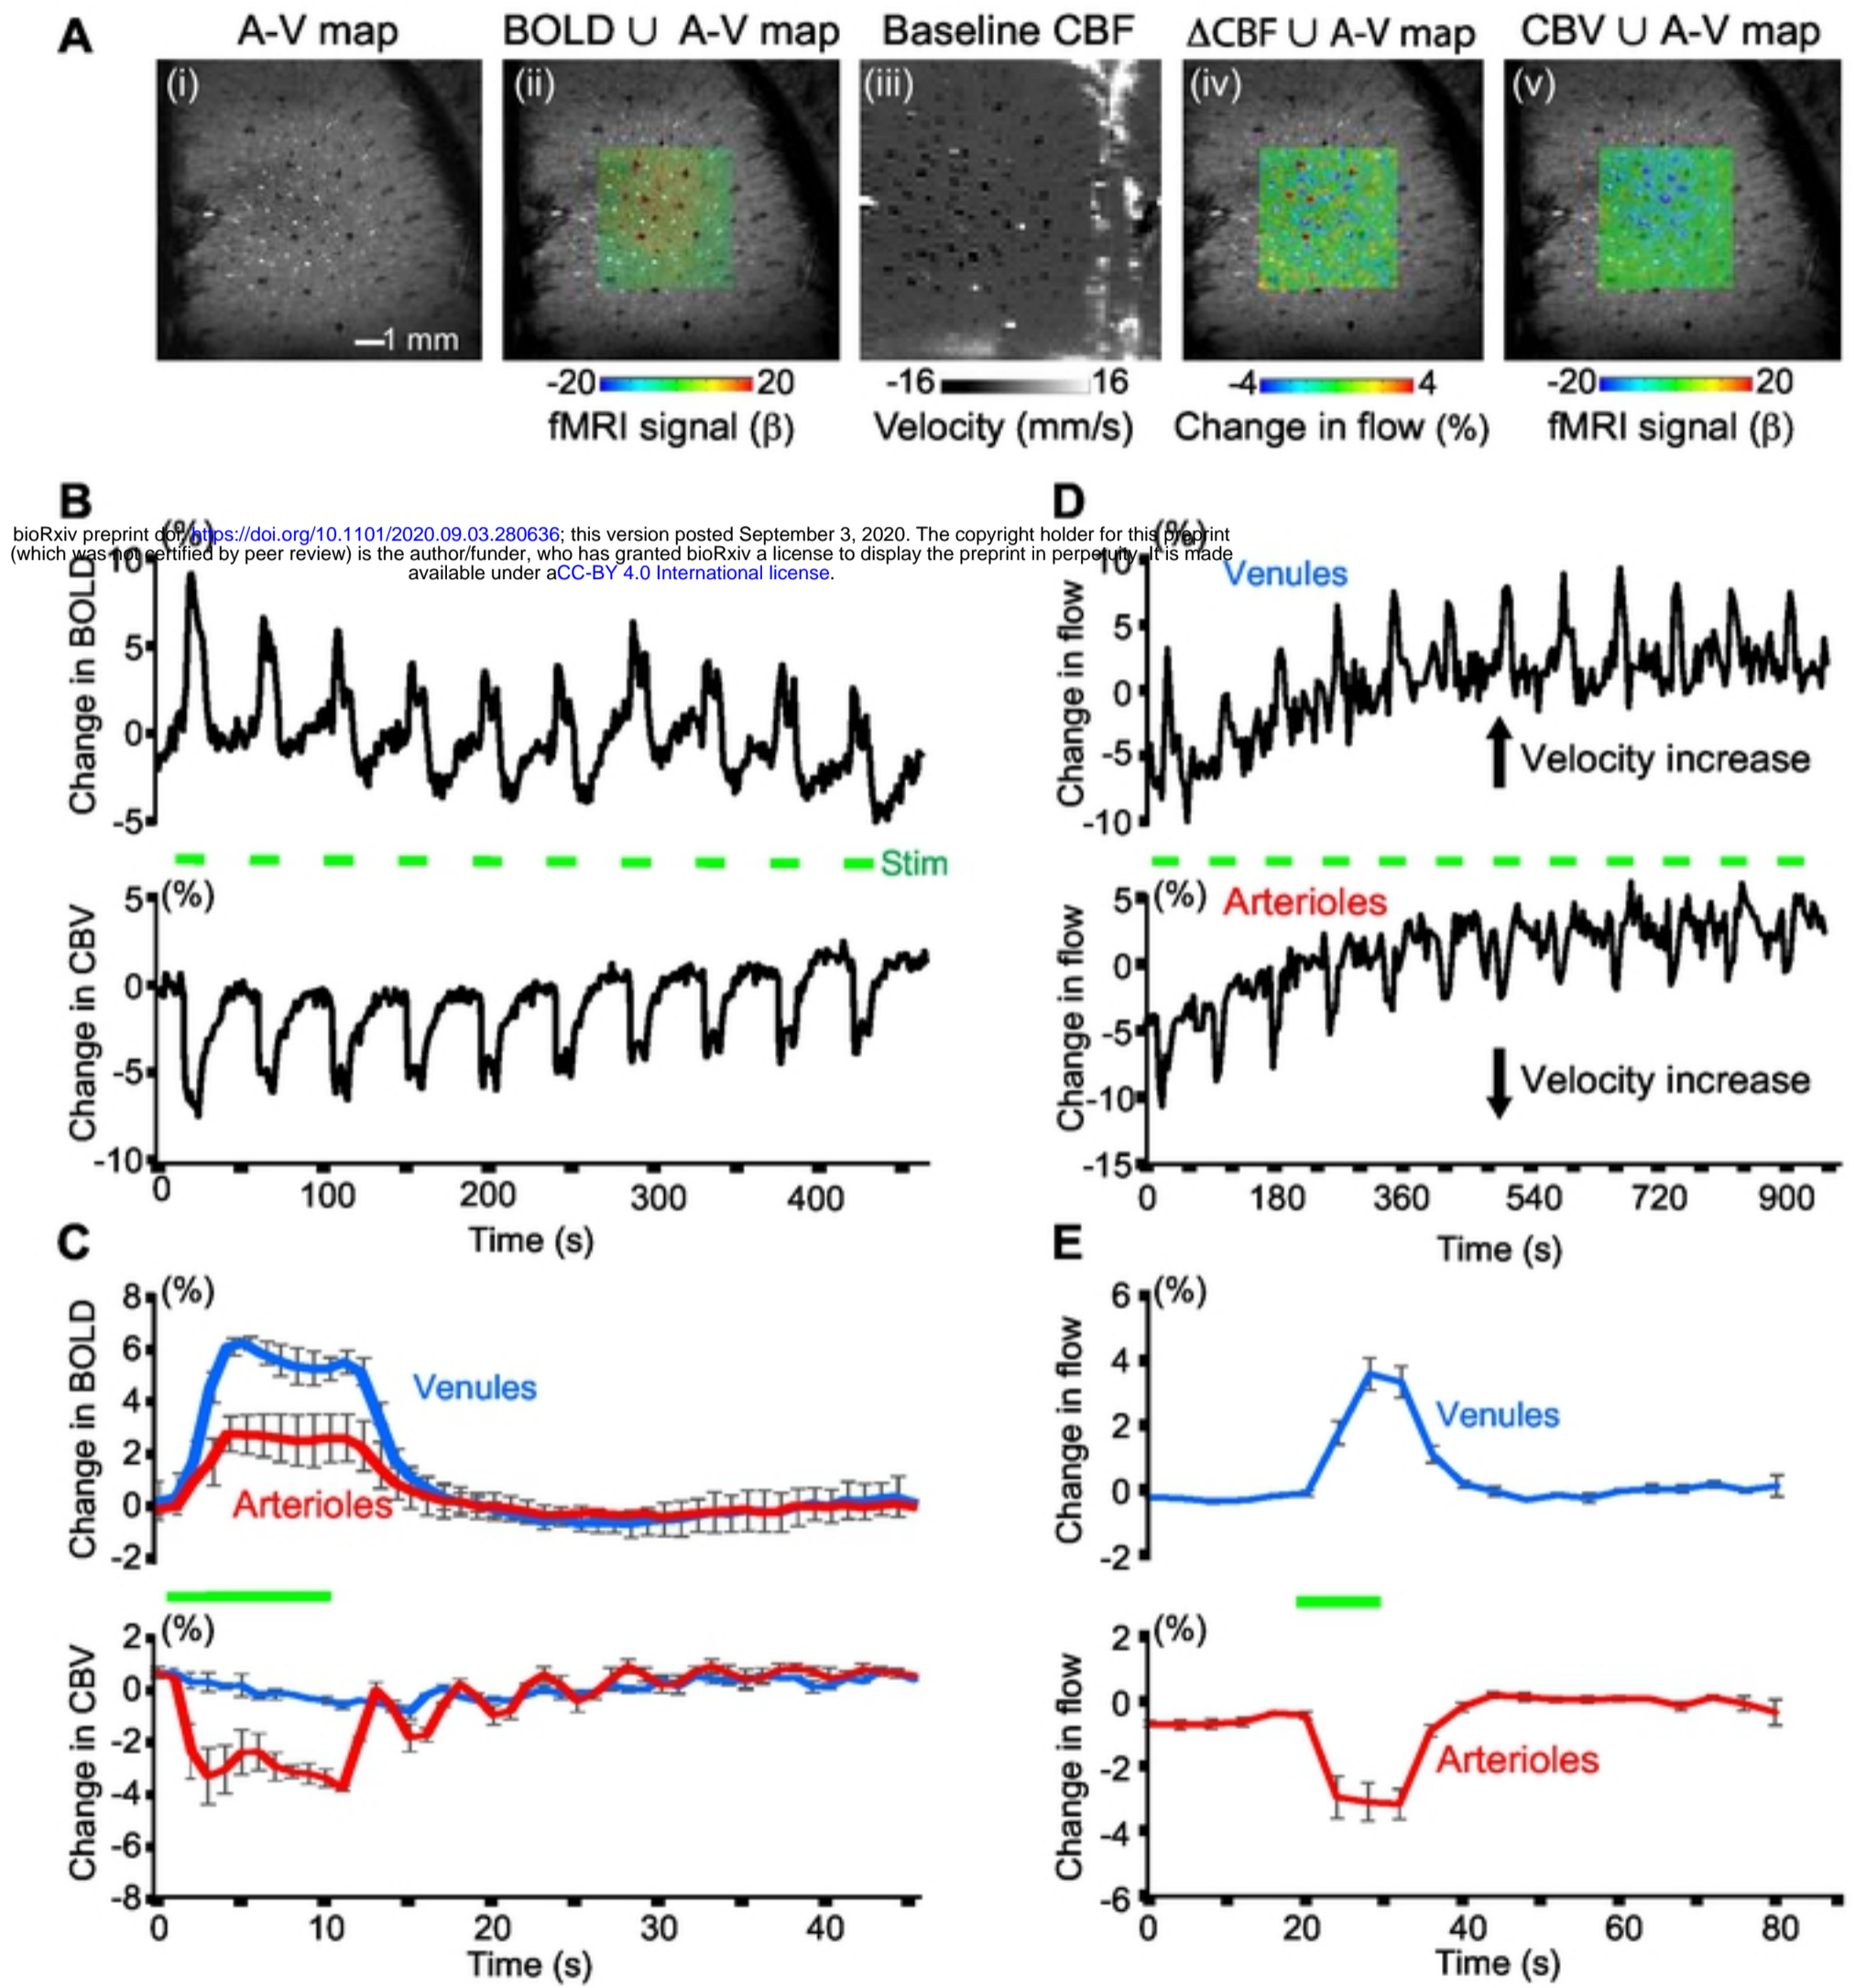

Figure 3. Chen, Jiang, Choi, Pohmann, Scheffler, Kleinfeld and Yu
